# Supplementary material for: Strong correlation of downregulated genes related to synaptic transmission and mitochondria in post-mortem autism cerebral cortex
Source: Springer Nature journal article supplement (doi:10.1186/s11689-018-9237-x), 2018-06-01

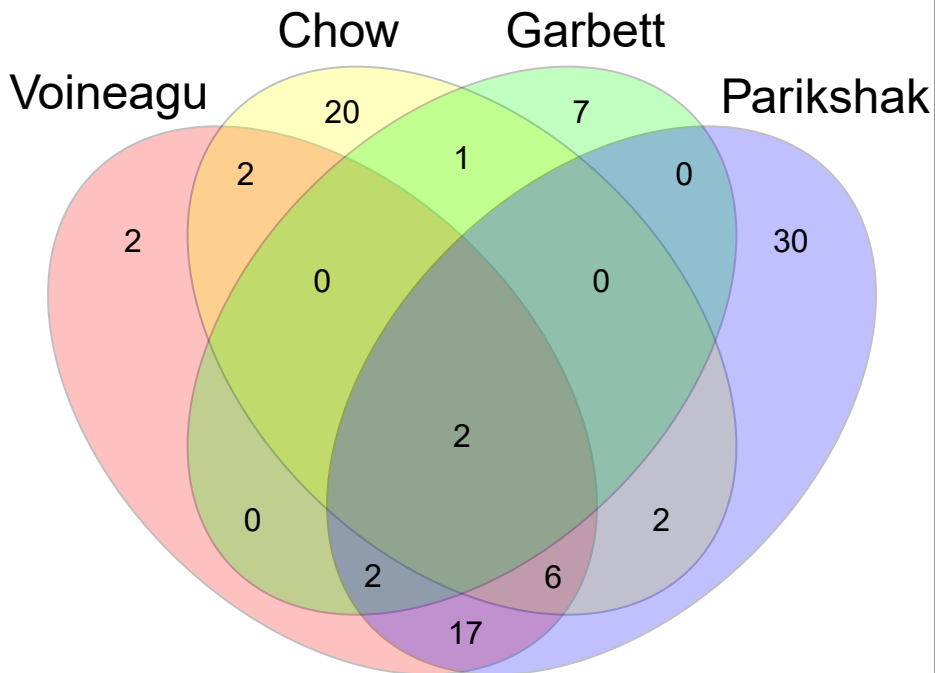

Supplement: MOESM1 [file 15812346]
