# Supplementary material for: Strong correlation of downregulated genes related to synaptic transmission and mitochondria in post-mortem autism cerebral cortex
Source: Springer Nature journal article supplement (doi:10.1186/s11689-018-9237-x), 2018-06-01
Supplement: MOESM6 [file 15812346]

## Heatmap Key

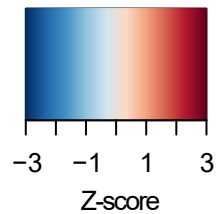Mitochondrial genes  
(Chow dataset)

Autism,  $n = 15$   
Control,  $n = 18$

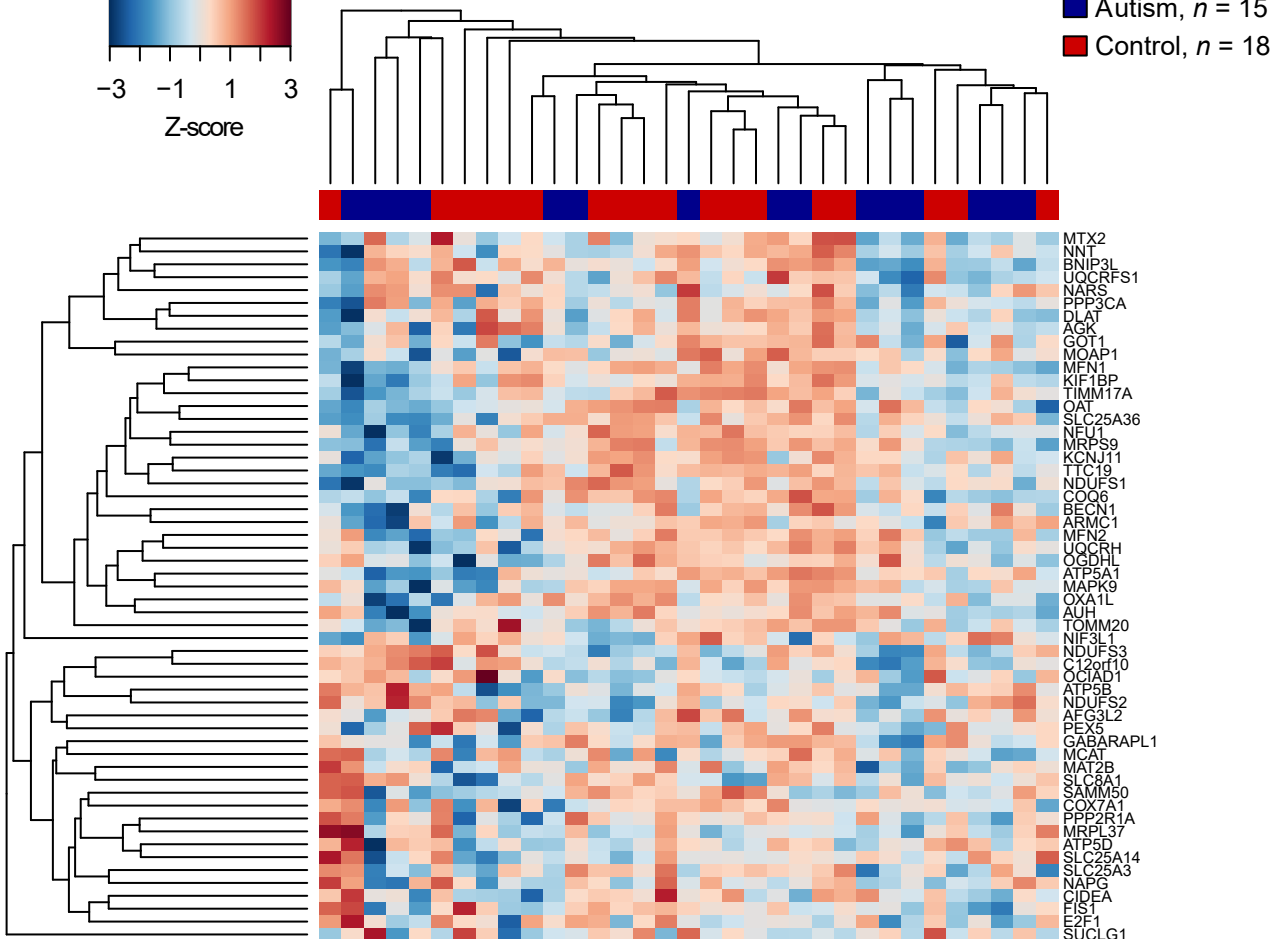Mitochondrial genes  
(Garbett dataset)

Autism,  $n = 6$   
Control,  $n = 6$

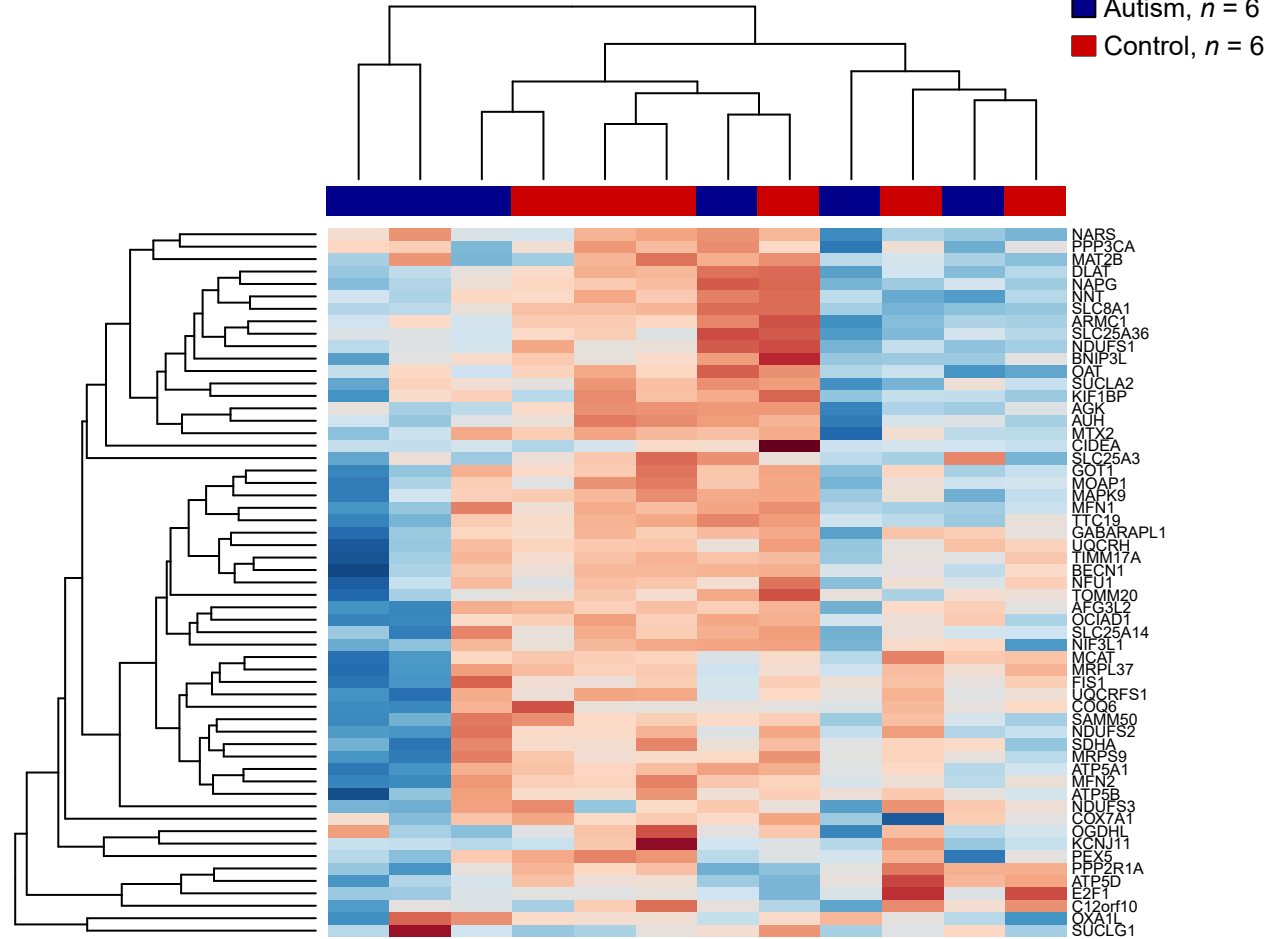

Dataset  
Parikshak  
Garbett  
Voineagu

P P P P P  
G G  
V V V V V V V V V

Dataset  
Parikshak  
Chow  
Voineagu

P P  
C C  
V V  
C  
C V V
